# Supplementary material for: Impact of Vaccination on Rotavirus Genotype Diversity: A Nearly Two-Decade-Long Epidemiological Study before and after Rotavirus Vaccine Introduction in Sicily, Italy
Source: MDPI journal article supplement (doi:10.3390/pathogens11040424), 2022-03-31
Supplement: s1 [file s1]

G1

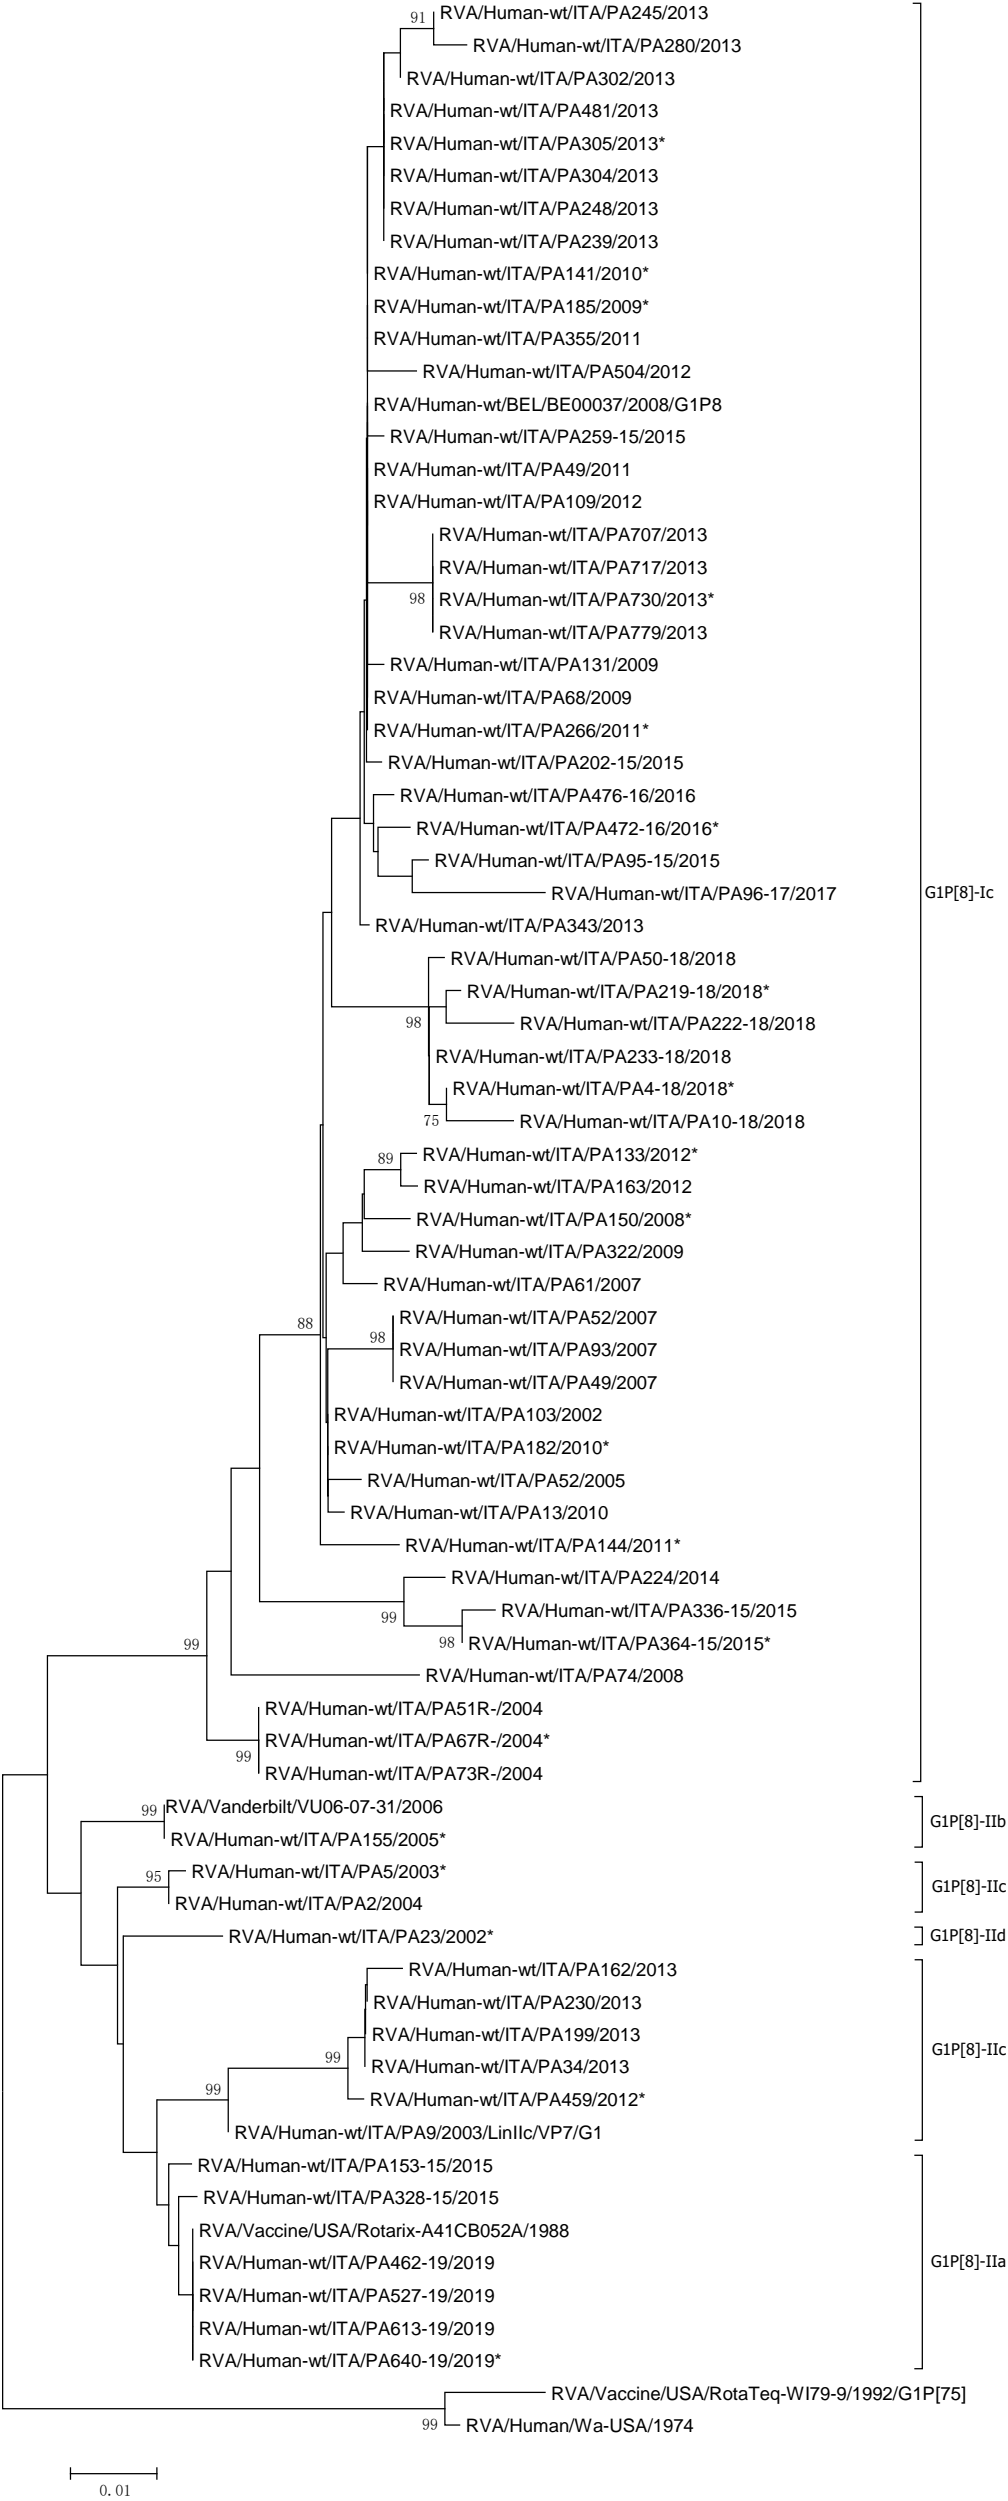

G2

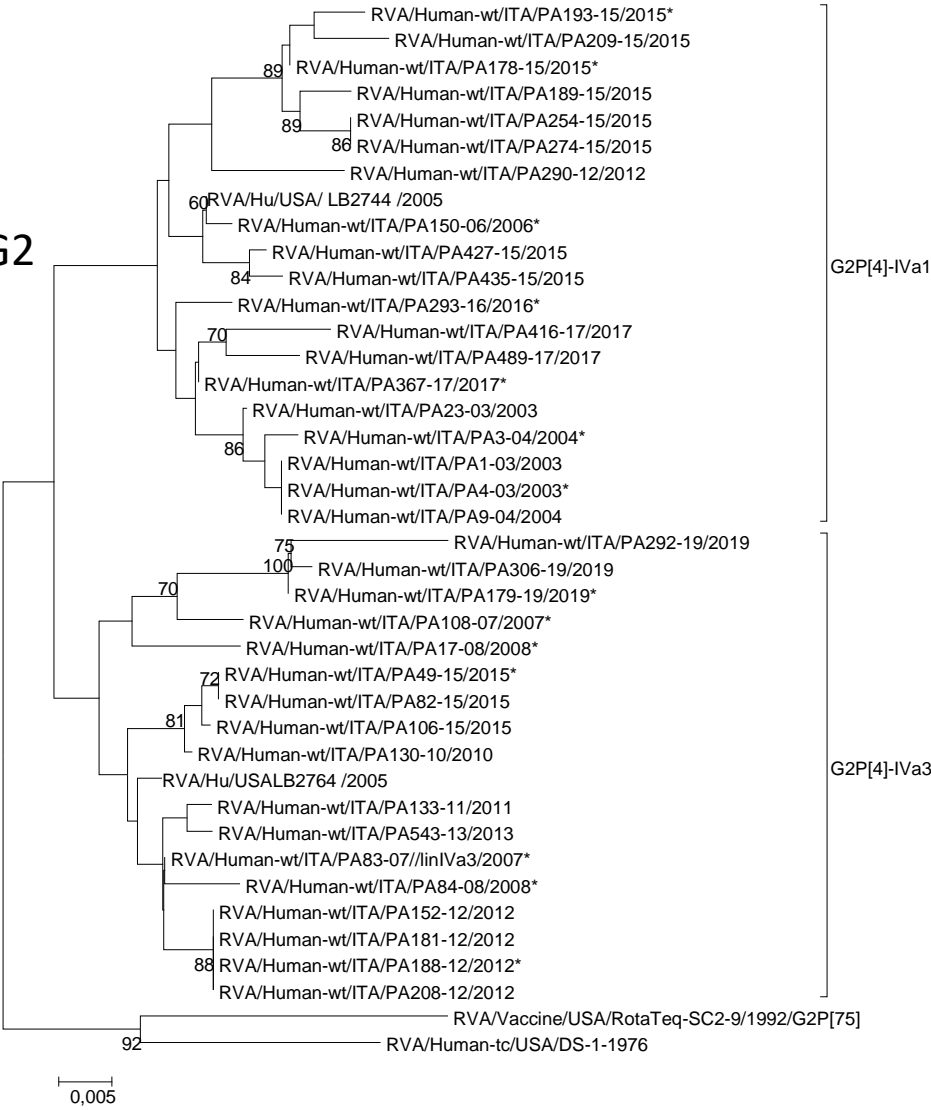

G3

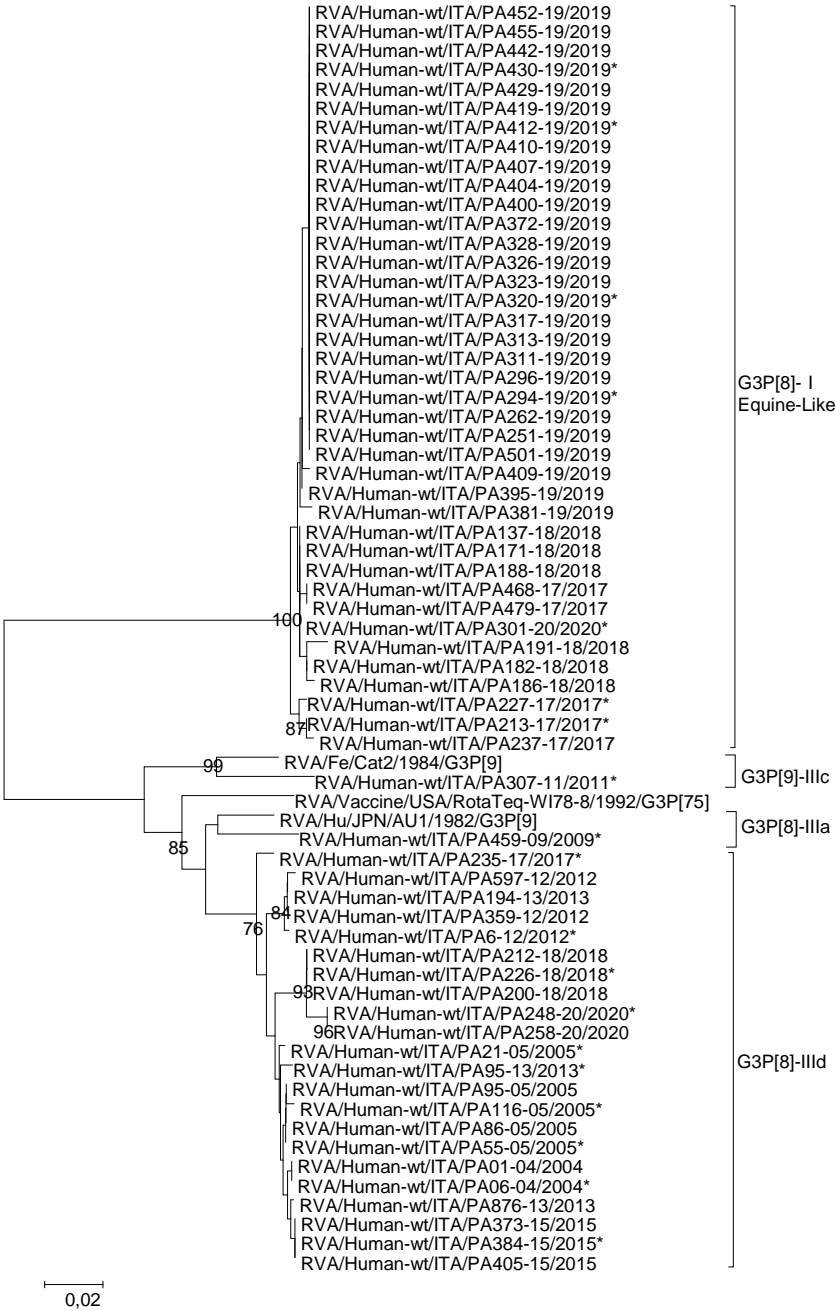

G4

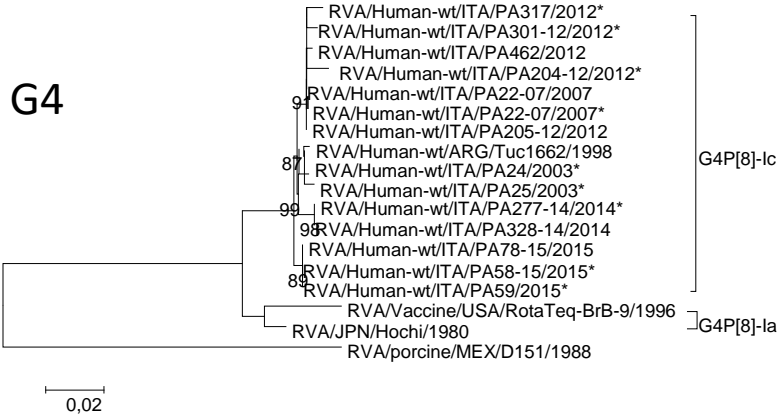

G9

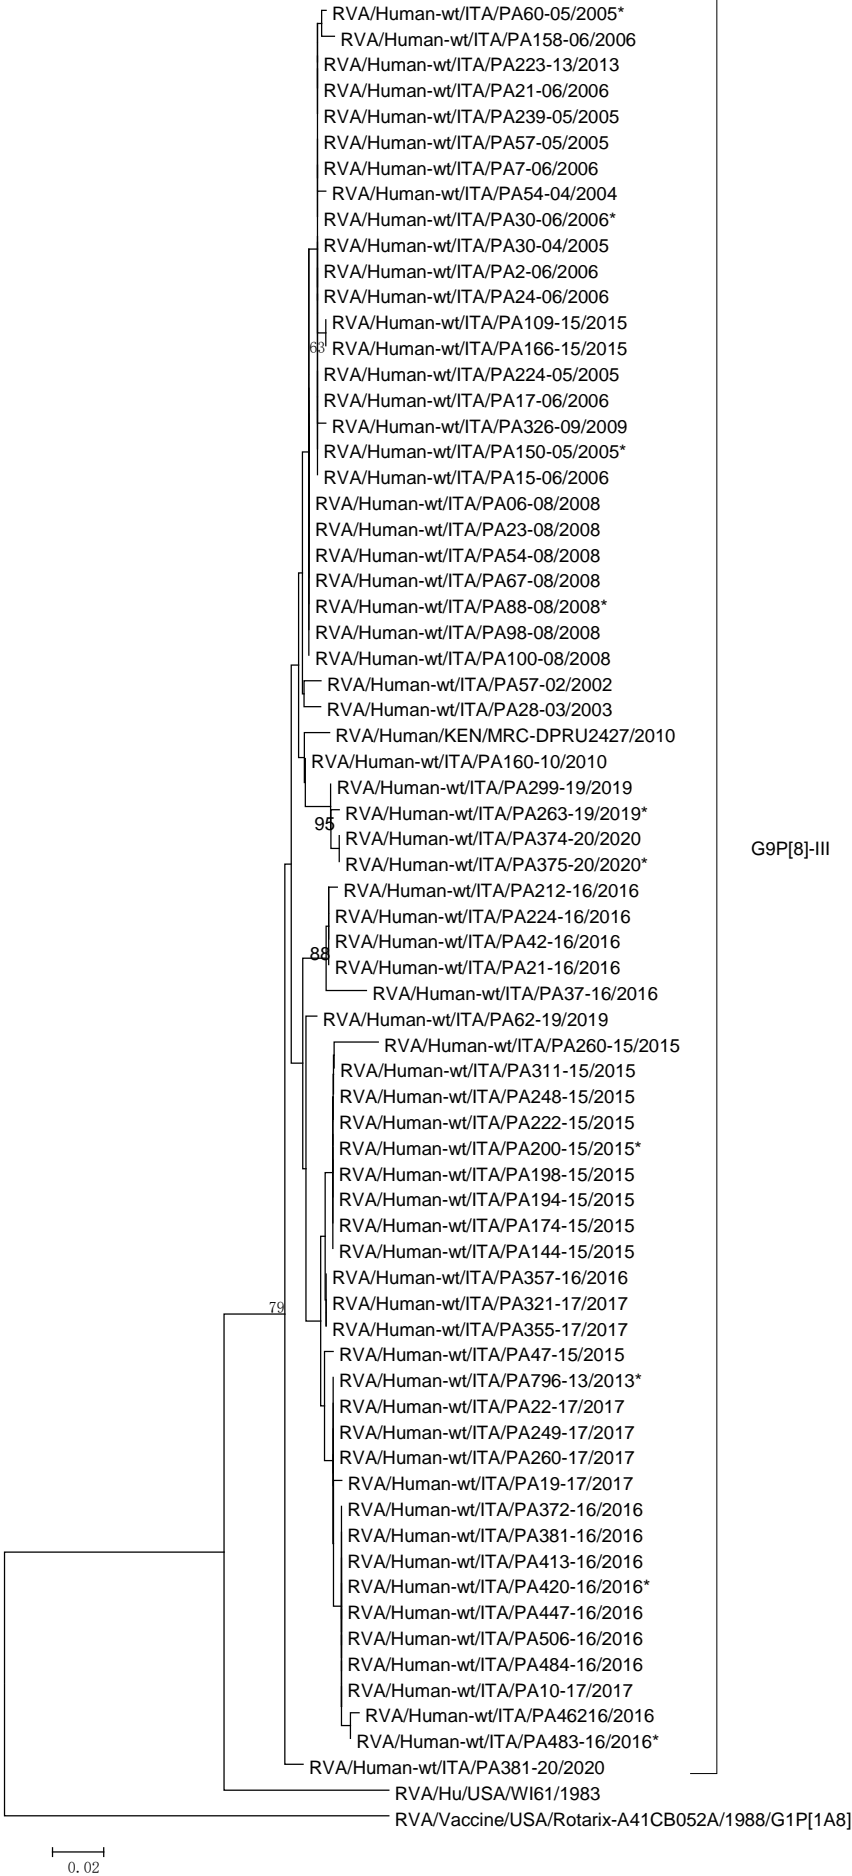

G12

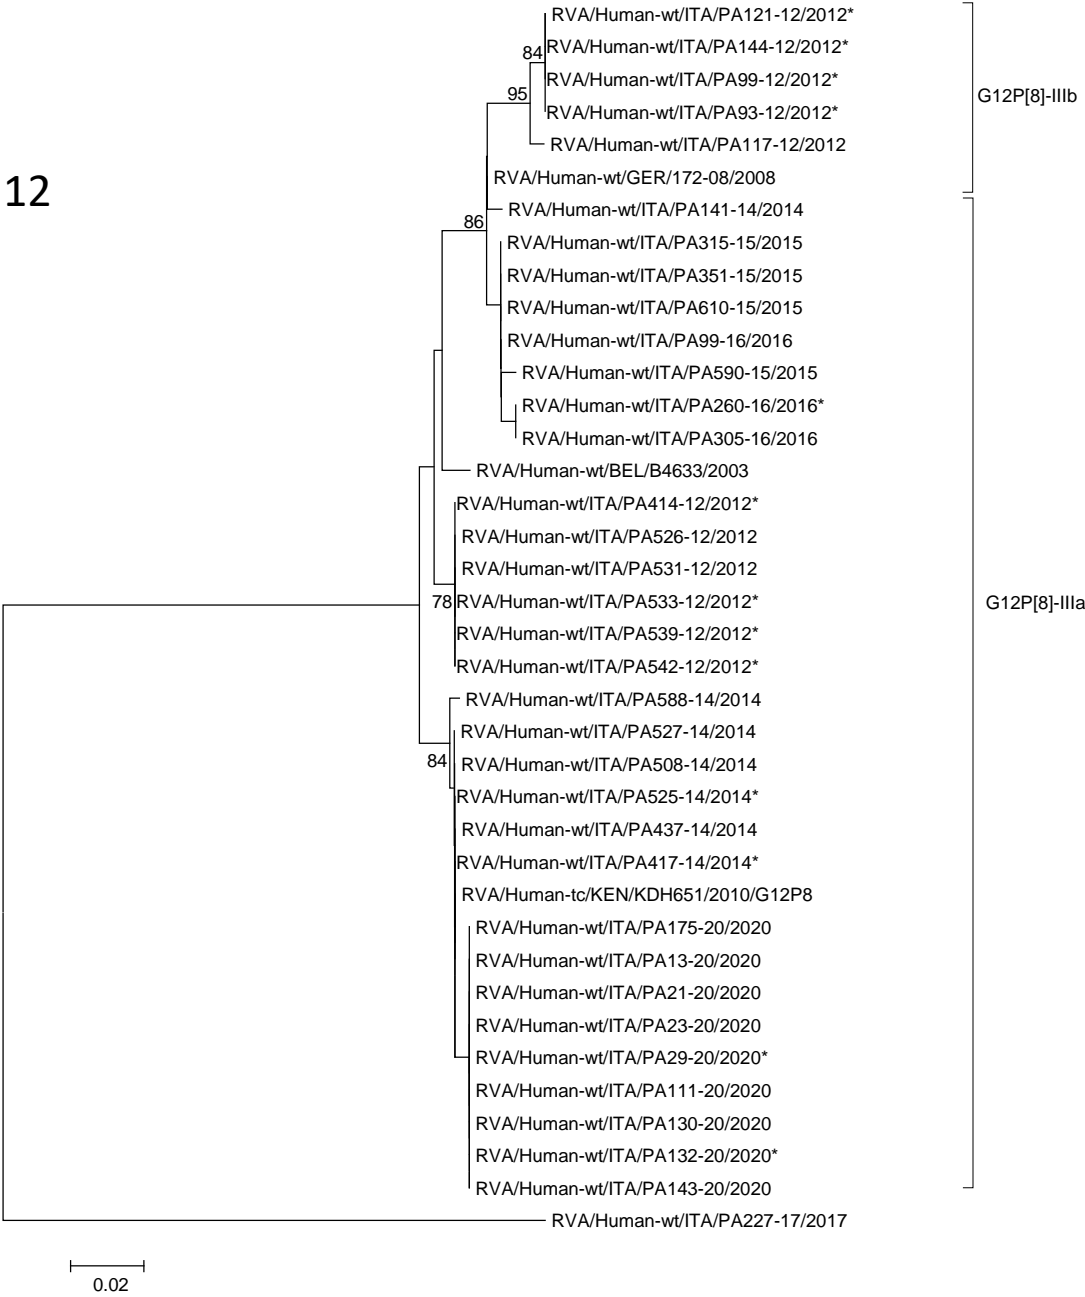

P[4]

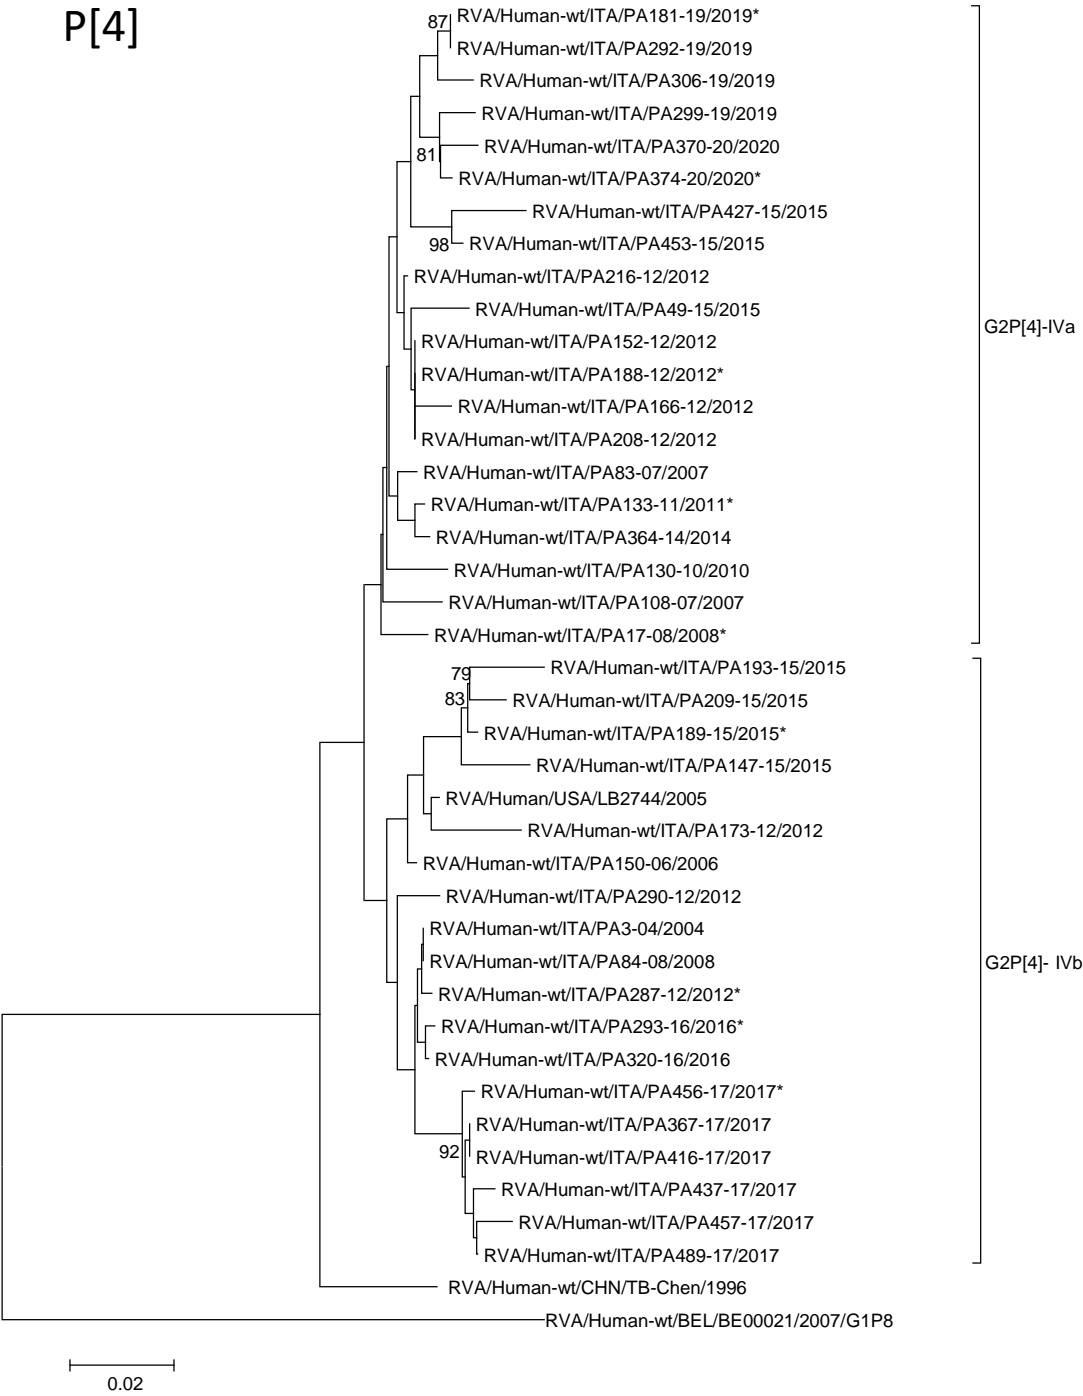

RVA/Human-wt/ITA/PA311-15/2015/VP4/G9P8  
 RVA/Human-wt/ITA/PA542-12/2012/VP4/G12P8  
 RVA/Human-wt/ITA/PA194-15/2015/VP4/G9P8  
 RVA/Human-wt/ITA/PA533-12/2012/VP4/G12P8  
 RVA/Human-wt/ITA/PA355-11/2011/VP4/G1P8  
 RVA/Human-wt/ITA/PA171-12/2012/VP4/G12P8  
 RVA/Human-wt/ITA/PA417-14/2014/VP4/G12P8  
 RVA/Human-wt/ITA/PA10-17/2017/VP4/G9P8  
 RVA/Human-wt/ITA/PA483-16/2016/VP4/G9P8  
 RVA/Human-wt/ITA/PA484-16/2016/VP4/G9P8  
 RVA/Human-wt/ITA/PA506-16/2016/VP4/G9P8  
 RVA/Human-wt/ITA/PA462-16/2016/VP4/G9P8  
 RVA/Human-wt/ITA/PA413-16/2016/VP4/G9P8  
 RVA/Human-wt/ITA/PA372-16/2016/VP4/G9P8  
 RVA/Human-wt/ITA/PA147-15/2015/VP4/G9P8  
 RVA/Human-wt/ITA/PA224-16/2016/VP4/G9P8  
 RVA/Human-wt/ITA/PA71-16/2016/VP4/G9P8  
 RVA/Human-wt/ITA/PA54-16/2016/VP4/G9P8  
 RVA/Human-wt/ITA/PA42-16/2016/VP4/G9P8  
 RVA/Human-wt/ITA/PA200-15/2015/VP4/G9P8  
 RVA/Human-wt/ITA/PA198-15/2015/VP4/G9P8  
 RVA/Human-wt/ITA/PA174-15/2015/VP4/G9P8  
 RVA/Human-wt/ITA/PA147-15/2015/VP4/G9P8  
 RVA/Human-wt/ITA/PA138-14/2014/VP4/G9P8  
 RVA/Human-wt/ITA/PA227-09/2009/VP4/G3P8  
 RVA/Human-wt/ITA/PA96-17/2017/VP4/G1P8  
 RVA/Human-wt/ITA/PA472-16/2016/VP4/G1P8  
 RVA/Human-wt/ITA/PA259-15/2015/VP4/G1P8  
 RVA/Human-wt/ITA/PA202-15/2015/VP4/G1P8\*  
 RVA/Human-wt/ITA/PA779-13/2013/VP4/G1P8  
 RVA/Human-wt/ITA/PA730-13/2013/VP4/G1P8  
 RVA/Human-wt/ITA/PA171-13/2013/VP4/G1P8  
 RVA/Human-wt/ITA/PA481-13/2013/VP4/G1P8  
 RVA/Human-wt/ITA/PA305-13/2013/VP4/G1P8  
 RVA/Human-wt/ITA/PA304-13/2013/VP4/G1P8  
 RVA/Human-wt/ITA/PA302-13/2013/VP4/G1P8  
 RVA/Human-wt/ITA/PA280-13/2013/VP4/G1P8  
 RVA/Human-wt/ITA/PA248-13/2013/VP4/G1P8  
 RVA/Human-wt/ITA/PA245-13/2013/VP4/G1P8  
 RVA/Human-wt/ITA/PA239-13/2013/VP4/G1P8  
 RVA/Human-wt/PA505-09/2009/VP4/G1P8  
 RVA/Human-wt/PA163-12/2012/VP4/G1P8  
 RVA/Human-wt/PA109-12/2012/VP4/G1P8  
 RVA/Human-wt/PA266-11/2011/VP4/G1P8\*  
 RVA/Human-wt/PA49-11/2011/VP4/G1P8  
 RVA/Human-wt/PA15-10/2010/VP4/G1P8  
 RVA/Human-wt/PA141-10/2010/VP4/G1P8\*  
 RVA/Human-wt/PA185-09/2009/VP4/G1P8  
 RVA/Human-wt/PA13-09/2009/VP4/G1P8  
 RVA/Human-wt/ITA/PA231-13/2013/VP4/G1P8  
 RVA/Human-wt/ITA/PA95-15/2015/VP4/G1P8\*  
 RVA/Human-wt/ITA/PA185-14/2014/VP4/G1P8  
 RVA/Human-wt/ITA/PA331-14/2014/G3P8  
 RVA/Human-wt/ITA/PA447-16/2016/VP4/G9P8  
 RVA/Human-wt/ITA/PA381-20/2020/VP4/G9P8  
 RVA/Human-wt/ITA/PA62-19/2019/VP4/G9P8  
 RVA/Human-wt/ITA/PA248-20/2020/G3P8  
 RVA/Human-wt/ITA/PA237-03/2003/VP4/G3P8  
 RVA/Human-wt/ITA/PA45-03/2003/VP4/G3P8  
 RVA/Human-wt/ITA/PA46-03/2003/VP4/G3P8  
 RVA/Human-wt/ITA/PA1/2004/G3P8  
 RVA/Human-wt/ITA/PA167-14/2014/VP4/G9P8  
 RVA/Human-wt/ITA/PA6-08/2008/VP4/G9P8  
 RVA/Human-wt/ITA/PA23-08/2008/VP4/G9P8  
 RVA/Human-wt/ITA/PA49-08/2008/VP4/G9P8\*  
 RVA/Human-wt/ITA/PA67-08/2008/VP4/G9P8  
 RVA/Human-wt/ITA/PA98-08/2008/VP4/G9P8  
 RVA/Human-wt/ITA/PA98-08/2008/VP4/G9P8  
 RVA/Human-wt/ITA/PA54-08/2008/VP4/G9P8  
 RVA/Human-wt/ITA/PA100-08/2008/VP4/G9P8  
 RVA/Human-wt/ITA/PA223-13/2013/VP4/G9P8  
 RVA/Human-wt/ITA/PA330-09/2009/VP4/G9P8  
 RVA/Human-wt/ITA/PA158-06/2006/VP4/G9P8  
 RVA/Human-wt/ITA/PA30-06/2006/VP4/G9P8  
 RVA/Human-wt/ITA/PA24-06/2006/VP4/G9P8\*  
 RVA/Human-wt/ITA/PA21-06/2006/VP4/G9P8  
 RVA/Human-wt/ITA/PA17-06/2006/VP4/G9P8  
 RVA/Human-wt/ITA/PA7-06/2006/VP4/G9P8  
 RVA/Human-wt/ITA/PA2-06/2006/VP4/G9P8  
 RVA/Human-wt/ITA/PA224-05/2005/VP4/G9P8  
 RVA/Human-wt/ITA/PA60-05/2005/VP4/G9P8  
 RVA/Human-wt/ITA/PA224-05/2005/VP4/G9P8  
 RVA/Human-wt/ITA/PA116-05/2005/VP4/G3P8  
 RVA/Human-wt/ITA/PA110-05/2005/VP4/G3P8  
 RVA/Human-wt/ITA/PA10-05/2005/VP4/G3P8  
 RVA/Human-wt/ITA/PA49-03/2003/VP4/G3P8  
 RVA/Human-wt/ITA/PA672-13/2013/VP4/G1P8  
 RVA/Human-wt/ITA/PA162-13/2013/VP4/G1P8  
 RVA/Human-wt/PA459-12/2012/VP4/G1P8\*  
 RVA/Human-wt/PA13-10/2010/VP4/G1P8  
 RVA/Human-wt/PA103-02/2002/VP4/G1P8  
 RVA/Human-wt/PA170-07/2007/VP4/G1P8  
 RVA/Human-wt/ITA/PA219-18/2018/VP4/G1P8  
 RVA/Human-wt/ITA/PA23-18/2018/VP4/G1P8\*  
 RVA/Human-wt/ITA/PA200-18/2018/VP4/G3P8  
 RVA/Human-wt/ITA/PA226-18/2018/VP4/G3P8  
 RVA/Human-wt/ITA/PA93-12/2012/VP4/G12P8  
 RVA/Human-wt/ITA/PA99-12/2012/VP4/G12P8  
 RVA/Human-wt/ITA/PA121-12/2012/VP4/G12P8  
 RVA/Human-wt/ITA/PA144-12/2012/VP4/G12P8  
 RVA/Human-wt/ITA/PA117-12/2012/VP4/G12P8  
 RVA/Human-wt/ITA/PA10-18/2018/VP4/G12P8  
 RVA/Human-wt/ITA/PA222-18/2018/VP4/G12P8  
 RVA/Human-wt/BEL/BE00021/2007/G1P8  
 RVA/Human-wt/ITA/PA525-14/2014/VP4/G12P8  
 RVA/Human-wt/ITA/PA527-14/2014/VP4/G12P8  
 RVA/Human-wt/ITA/PA437-14/2014/VP4/G12P8  
 RVA/Human-wt/ITA/PA182-18/2018/VP4/G3P8  
 RVA/Human-wt/ITA/PA191-18/2018/VP4/G3P8  
 RVA/Human-wt/ITA/PA99-16/2016/VP4/G12P8  
 RVA/Human-wt/ITA/PA378-15/2015/VP4/G12P8  
 RVA/Human-wt/ITA/PA501-19/2019/VP4/G3P8  
 RVA/Human-wt/ITA/PA395-19/2019/VP4/G3P8  
 RVA/Human-wt/ITA/PA411-19/2019/G3P8  
 RVA/Human-wt/ITA/PA429-19/2019/G3P8  
 RVA/Human-wt/ITA/PA400-19/2019/G3P8\*  
 RVA/Human-wt/ITA/PA317-19/2019/G3P8  
 RVA/Human-wt/ITA/PA468-17/2017/VP4/G3P8  
 RVA/Human-wt/ITA/PA952013/G3P8  
 RVA/Human-wt/PA61-07/2007/VP4/G1P8  
 RVA/Human-wt/PA5-03/2003/VP4/G1P8  
 RVA/Human-wt/ITA/PA351-15/2015/VP4/G12P8  
 RVA/Human-wt/ITA/PA260-16/2016/VP4/G12P8  
 RVA/Human-wt/ITA/PA452-19/2019/VP4/G3P8  
 RVA/Human-wt/ITA/PA381-19/2019/VP4/G3P8  
 RVA/Human-wt/ITA/PA410-19/2019/G3P8  
 RVA/Human-wt/ITA/PA419-19/2019/G3P8  
 RVA/Human-wt/ITA/PA294-19/2019/G3P8  
 RVA/Human-wt/ITA/PA326-19/2019/G3P8  
 RVA/Human-wt/ITA/PA237-17/2017/VP4/G3P8  
 RVA/Human-wt/ITA/PA224-14/2014/VP4/G1P8\*  
 RVA/Human-wt/PA52-07/2007/VP4/G1P8  
 RVA/Human-wt/ITA/PA301-20/2020/VP4/G3Equine-like P8  
 RVA/Human-wt/ITA/PA307-20/2020/VP4/G3Equine-like P8  
 RVA/Human-wt/ITA/PA610-15/2

G1P[8]-III

Figure S1: Phylogenetic analysis of partial VP7 (G1–4, G9 and G12) and VP4 (P[4]–P[8]) nucleotide sequences of Italian strains detected in the study. The phylogenetic trees were built using the neighbor-joining method and Kimura's two-parameter model, and bootstrapped with 1000 repetitions. Bootstrap values 75% are indicated. \* Sequences availables in GenBank, under the following accession numbers (VP7, G1:ON525269 - ON525287, G2:ON525288 - ON525295, G3:ON525296 - ON525309, G4:ON525310 - ON525314, G9:ON525315 - ON525325, G12:ON525326 - ON525328; VP4, P4:ON525329 - ON525336, P8:ON525337 - ON525350)
